# Supplementary material for: Static and Resonant Properties and Magnetic Phase Diagram of LiMn2TeO6
Source: MDPI journal article supplement (doi:10.3390/ma15238694), 2022-12-06
Supplement: s1 [file s1]

## Supplementary Materials

for the article

### Complex spin ordering and magnetic phase diagram of $\text{LiMn}_2\text{TeO}_6$

Tatyana Vasilchikova,<sup>1,5</sup> Evgeniya Vavilova,<sup>2</sup> Timur Salikhov,<sup>2</sup> Vladimir Nalbandyan,<sup>3</sup> Shanu Dengre,<sup>4</sup> Rajib Sarkar,<sup>4</sup> Hans-Henning Klauss,<sup>4</sup> Alexander Vasiliev<sup>1,5</sup>

<sup>1</sup>*Lomonosov Moscow State University, 119991 Moscow, Russia*

<sup>2</sup>*Zavoisky Physical-Technical Institute, FRC Kazan Scientific Center of RAS, 420029 Kazan, Russia*

<sup>3</sup>*Southern Federal University, 344090 Rostov-on-Don, Russia*

<sup>4</sup>*Institute for Solid State and Material Physics, Technische Universität Dresden, 01069 Dresden, Germany*

<sup>5</sup>*National University of Science and Technology "MISiS", 119949 Moscow, Russia*

\*Corresponding author: anvas2000@yahoo.com

#### S1. *ac* susceptibility

The frequency shift of the  $T_f$ , i.e. the peak shift per decade of frequency ( $\omega = 2\pi f$ ) can be quantified by the Mydosh parameter [S1]:

$$K = \frac{\Delta T_f}{T_f \Delta(\log \omega)}$$

This parameter allows to distinguish a spin-glass behavior from a superparamagnet one. The  $K$  value has been categorized as 0.005 – 0.01 for spin glass,  $\sim 0.03$  – 0.06 for cluster glass, and  $> 0.1$  for superparamagnetic compounds [S1]. For  $\text{LiMn}_2\text{TeO}_6$  we estimated  $K$  as 0.03, which falls in the range expected for cluster glasses.

The variation of the freezing temperature  $T_f$  with the relaxation time  $\tau$  can be analyzed with a critical slowing down model [S2-S4]. The frequency dependence of  $T_f$  data fits well with the power law [S2-S4]:

$$\tau(T_f) = \tau_0 \left( \frac{T_f}{T_g} - 1 \right)^{z\nu}$$

as shown on the Figure S1, where  $\tau_0$  is microscopic spin flipping time,  $T_f$  is frequency dependent freezing temperature at which the maximum relaxation time ( $\tau = 1/\omega$ ) of the system correspond to the measured frequency,  $T_g$  is glassy freezing temperature (as  $f \rightarrow 0$ ) and  $z\nu$  denote the critical exponent. Typically, the value  $\tau_0$  lies within the range of  $10^{-10}$  to  $10^{-14}$  s, and the exponent  $z\nu$  ranging from 4 to 12 [S1-S5]. The best fit of our experimental data yielded the following quantities:  $T_g = 14$  K,  $\tau_0 = 10^{-11}$  s, and  $z\nu = 7$ . Obviously, these values are in good agreement with those for well-known manganese spin cluster and reentrants spin glass materials [S4, S6-S11].

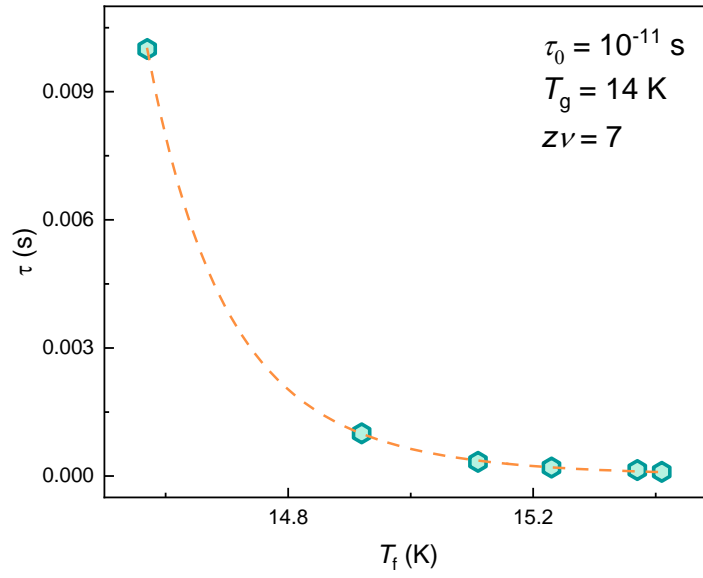

**Figure S1.** Critical slowing down behavior of the peak position  $T_f$ .

## S2. NMR

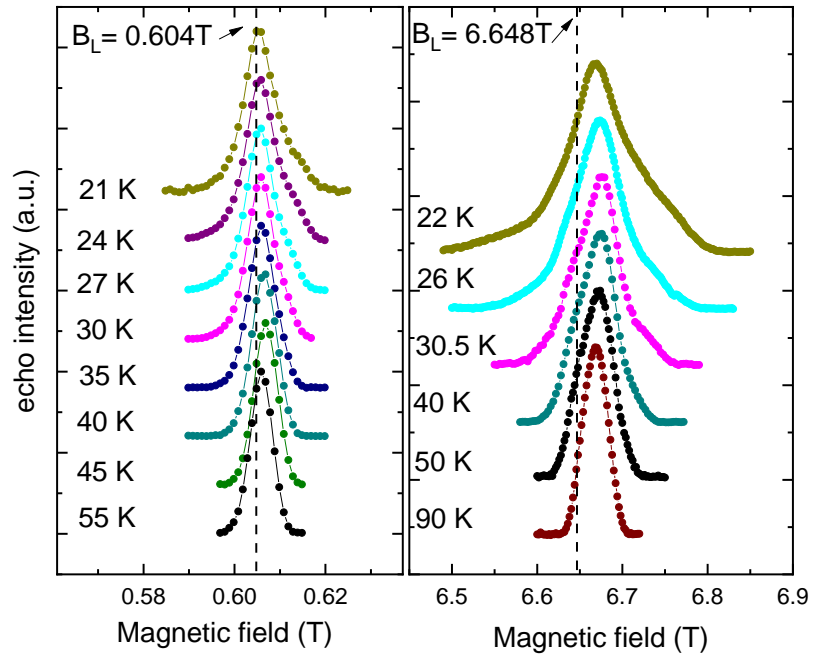

**Figure S2.**  $^7\text{Li}$  NMR spectrum for  $\text{LiMn}_2\text{TeO}_6$  at different temperatures in low and high external fields.

The observed  $^7\text{Li}$  NMR spectrum (see Fig. S2) is a superposition of the signals from all lithium nuclei in the powder sample. The structure of the  $^7\text{Li}$  NMR line in the paramagnetic temperature

region is smeared out by the random distribution of the crystallographic and the hyperfine field tensor axes in the powder sample and spectra have atypical slightly asymmetric powder lineshape.  $^7\text{Li}$  has a nuclei spin  $I = 3/2$  and a quadrupole moment  $-4.01 \times 10^{-30} \text{ m}^2$ . However, the quadrupole splitting is not resolved in the inhomogeneously broadened spectrum of the powder sample. The line shift  $k$  was determined from the position of the maxima of the spectrum  $H_{\text{max}}$  as  $k = 100\% (H_{\text{max}} - H_L)/H_L$ , where  $H_L = \omega_L \gamma^7\text{Li}$  and  $\omega_L$  is a Larmor frequency.

## References

- S1. Mydosh, J. A. *Spin Glasses, An Experimental Introduction*; Taylor & Francis: London, 1993.
- S2. Mydosh, J. A. Spin glasses: redux: an updated experimental/materials survey. *Rep. Prog. Phys.* **2015**, 78, 052501. <https://doi.org/10.1088/0034-4885/78/5/052501>.
- S3. Binder, K.; Young, A. P. Spin glasses: Experimental facts, theoretical concepts, and open questions. *Rev. Mod. Phys.* **1986**, 58, 801-976. <https://doi.org/10.1103/RevModPhys.58.801>.
- S4. Chun, S. H.; Lyanda-Geller, Y.; Salamon, M. B.; Suryanarayanan, R.; Dhalenne, G.; Reichevski, A. Reentrant spin glass behavior in layered manganite  $\text{La}_{1.2}\text{Sr}_{1.8}\text{Mn}_2\text{O}_7$  single crystals, *Journal of Applied Physics* **2001**, 90, 6307-6311. <https://doi.org/10.1063/1.1419260>.
- S5. Balanda, M. AC Susceptibility Studies of Phase Transitions and Magnetic Relaxation: Conventional, Molecular and Low-Dimensional Magnets. *Acta Phys. Pol.* **2013**, A 124, 964-967. <https://doi.org/10.12693/APhysPolA.124.964>.
- S6. Gunnarsson, K.; Svedlindh, P.; Nordblad, P.; Lundgren, L.; Aruga, H.; Ito, A. Dynamics of an Ising Spin-Glass in the Vicinity of the Spin-Glass Temperature. *Phys. Rev. Lett.* **1988**, 61, 754-757. <https://doi.org/10.1103/PhysRevLett.61.754>.
- S7. Kumar, N. Rajeesh; Karthik, R.; Vasylechko, L.; Selvan, R. Kalai. Reentrant spin-glass behaviour in highly frustrated Mn-rich spinel zinc manganate. *J. Phys.: Condens. Matter* **2020**, 32, 245802. <https://doi.org/10.1088/1361-648X/ab786e>
- S8. Ghosh, D.; Dutta, U.; Haque, A.; Mordvinova, N.; Lebedev, O.; Pal, K.; Gayen, A.; Mahata, P.; Kundu, A.; Seikh, M. Evidence of low temperature spin glass transition in bixbyite type  $\text{FeMnO}_3$ . *Materials Science & Engineering B* **2017**, 226, 206-210. <https://doi.org/10.1016/j.mseb.2017.09.022>.
- S9. Kolesnik, S.; Dabrowski, B.; Chmaissem, O. Structural and physical properties of  $\text{SrMn}_{1-x}\text{Ru}_x\text{O}_3$  perovskites. *Phys. Rev. B* **2008**, 78, 214425. <https://doi.org/10.1103/PhysRevB.78.214425>.
- S10. Jeon, B.-G.; Yoo, K.; Kim, K.; Sundaresan, A. Reentrant spin-glass state and magnetodielectric effect in the spiral magnet  $\text{BiMnFe}_2\text{O}_6$ . *Phys. Rev. B* **2014**, 90, 024413. <https://doi.org/10.1103/PhysRevB.90.024413>.
- S11. Greedan, J. E.; Raju, N. P.; Maignan, A.; Simon, Ch.; Pedersen J. S.; Niraimathi, A. M.; Gmelin, E.; Subramanian, M. A. Frustrated pyrochlore oxides,  $\text{Y}_2\text{Mn}_2\text{O}_7$ ,  $\text{Ho}_2\text{Mn}_2\text{O}_7$ , and  $\text{Yb}_2\text{Mn}_2\text{O}_7$ : Bulk magnetism and magnetic microstructure. *Phys. Rev. B* **1996**, 54, 7189-7200. <https://doi.org/10.1103/PhysRevB.54.7189>.
